# Supplementary material
Source: publisher site journal article supplement (https://www.dovepress.com/article/310604)
Supplement: Supplementary file 1 [file get_supplementary_file.php]

**Supplementary Table 1: List of Studies, Study Sites and IECs and IRBs**

| **Study** | **Site No.** | **Name/Address of IEC/IRB** |
| --- | --- | --- |
| **CC-122-CP-002** | 001 | Salus IRB  2111 West Braker Lane  Suite 400  Austin, TX 78758  USA |
| **CC-122-CP-005** | 001 | IntegReview IRB  3815 S. Capital of Texas Hwy,  Suite 320  Austin, TX 78704  USA |
| 002 | IntegReview IRB  3815 S. Capital of Texas Hwy,  Suite 320  Austin, TX 78704  USA |
| **CC-122-ST-001** | 001 | Integreview Ethical Review Board  3001 S. Lamar Blvd., Suite 210  Austin, TX 78704 |

IEC = independent ethics committee; IRB = institutional review board.
